# Supplementary material for: Photodegradation and photostabilization of polymers, especially polystyrene: review
Source: PubMed Central journal article supplement (PMC4320144; doi:10.1186/2193-1801-2-398), 2013-08-23
Supplement: 40064_2013_1415_MOESM1_ESM.pdf [file 40064_2013_1415_MOESM1_ESM.pdf]

### (i) Chain initiation:

Hydroperoxide (POOH)

Carbonyl compounds (c=o)

Catalyst residue ( $Ti^{n}$ ,  $V^{+n}$  etc)

Charge transfer complexes (PH,  $O_2$ )

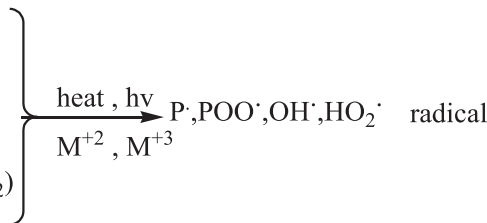

### (ii) Chain propagation:

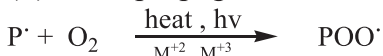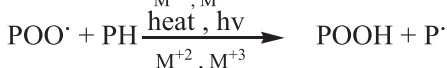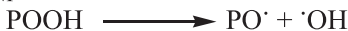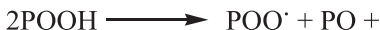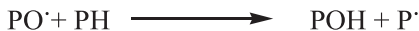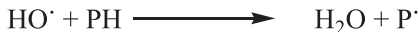

### (iii) Chain termination:

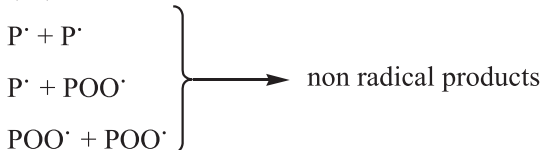

e.t.c

Where  $P^\cdot$  is polymer radical,  $M^{+2}$  is metal ion, and PH is polymer molecule
