# Supplementary material for: Photodegradation and photostabilization of polymers, especially polystyrene: review
Source: PubMed Central journal article supplement (PMC4320144; doi:10.1186/2193-1801-2-398), 2013-08-23
Supplement: 40064_2013_1415_MOESM22_ESM.pdf [file 40064_2013_1415_MOESM22_ESM.pdf]

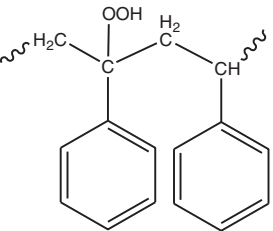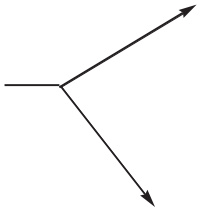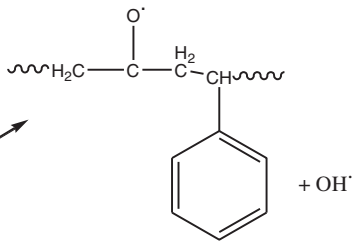

+  $\text{OH}^\bullet$

(32)

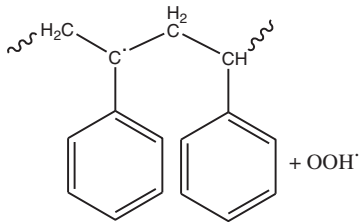

+  $\text{OOH}^\bullet$
