# Supplementary material for: Photodegradation and photostabilization of polymers, especially polystyrene: review
Source: PubMed Central journal article supplement (PMC4320144; doi:10.1186/2193-1801-2-398), 2013-08-23
Supplement: 40064_2013_1415_MOESM48_ESM.pdf [file 40064_2013_1415_MOESM48_ESM.pdf]

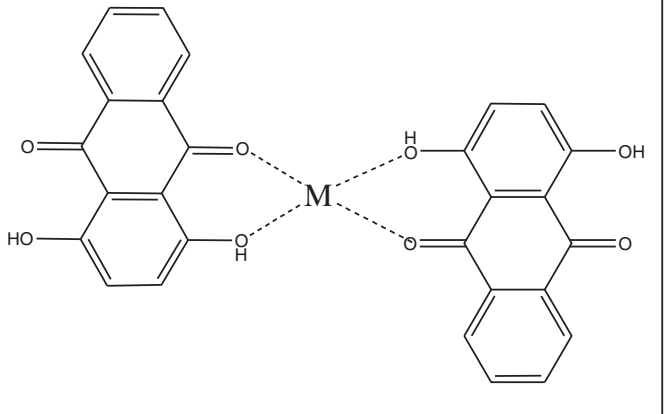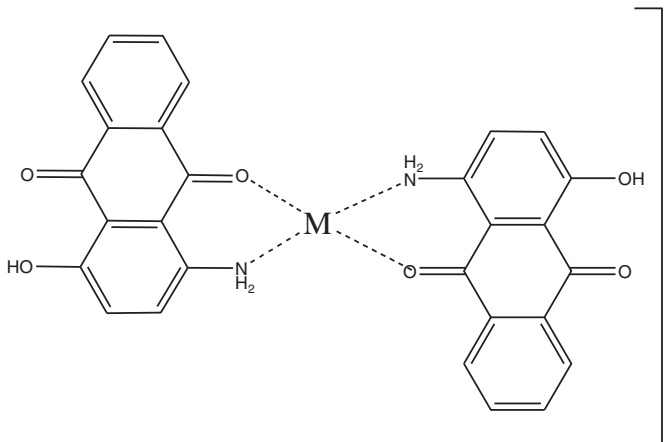

M=Cu , X=Cl

M=Vo , X=SO<sub>4</sub>

M=Ni , X=(CH<sub>3</sub>COO)<sub>2</sub>
